# Supplementary material for: Internet-Delivered Early Interventions for Individuals Exposed to Traumatic Events: Systematic Review
Source: PubMed Central journal article supplement (PMC6300083; doi:10.2196/jmir.9795), 2018-11-14
Supplement: jmir_v20i10e280_app1.pdf [file jmir_v20i10e280_app1.pdf]

Table 1. Description of interventions in included studies.

| Reference                  | Name of Intervention | Theoretical orientation of intervention; Delivery format (eg, psychoeducational, interactive) | Description of sessions/modules; Length of intervention                                    | Target population                                         | Timing to be delivered posttrauma | Therapist delivered, peer support or completely self-guided | Total Quality Rating Score |
|----------------------------|----------------------|-----------------------------------------------------------------------------------------------|--------------------------------------------------------------------------------------------|-----------------------------------------------------------|-----------------------------------|-------------------------------------------------------------|----------------------------|
| Cox et al, (2010)          | Kids and Accidents   | Cognitive and behavioural, resilience theory; Self-guided psychoeducational                   | Self-help psychoeducational information; NR <sup>a</sup> ; NR                              | 8-12 year-olds with a potentially traumatic medical event | Within 2 weeks                    | Self-guided                                                 | 21                         |
| Kassam-Adams et al, (2016) | Coping Coach         | CBT <sup>b</sup> principles; Interactive game with a storyline                                | Three interactive modules on feelings, avoidance, and appraisal; each module 20-30 minutes | School-age children exposed to recent trauma              | Early posttrauma period           | Self-guided                                                 | 23                         |

|                        |                 |                                                   |                                                                                                                                                                                                                                                                       |                                                             |                             |                                            |    |
|------------------------|-----------------|---------------------------------------------------|-----------------------------------------------------------------------------------------------------------------------------------------------------------------------------------------------------------------------------------------------------------------------|-------------------------------------------------------------|-----------------------------|--------------------------------------------|----|
| Mouthan et al, (2013)  | Trauma TIPS     | CBT Techniques; Brief-self guided psychoeducation | Six self-guided modules (introduction to program, assessment of acute anxiety and arousal, video explanation, text summary of coping tips, contact information for professional help for enduring symptoms; and Web forum for peer support); 30-minute duration total | Adults exposed to unintentional injury                      | Immediately                 | Self-guided and web forum for peer support | 24 |
| Ruggiero et al, (2015) | Bounce Back Now | CBT; Interactive modules                          | Seven interactive modules on posttraumatic stress, depressed mood, generalized anxiety, alcohol use, marijuana use, illicit drug use, and cigarette use; length varies.                                                                                               | Adults and adolescents with symptoms of distress posttrauma | Early post natural disaster | Self-guided                                | 22 |

|                          |                      |                                                          |                                                                                                                                                                                                       |                                    |                            |                                                                                                                         |    |
|--------------------------|----------------------|----------------------------------------------------------|-------------------------------------------------------------------------------------------------------------------------------------------------------------------------------------------------------|------------------------------------|----------------------------|-------------------------------------------------------------------------------------------------------------------------|----|
| Steinmatz et al (2012)   | My Disaster Recovery | Social Cognitive Theory; Interactive modules             | Six interactive modules on seeking professional help, relaxation, social support, unhelpful ways of coping, self-talk, and trauma triggers and memories; NR                                           | Adults exposed to natural disaster | Acutely following disaster | Self-guided                                                                                                             | 19 |
| Van Voorhes et al (2012) | VETS PREVAIL         | CBT; Self-guided lessons and instant messaging component | Online structured lessons, online peer-to-peer instant messaging and brief instant messages from a clinical social work sessions with weekly peer-to-peer and clinical support; Length of time varies | Combat veterans recently deployed  | Early intervention         | Peer-to-peer support via chats and brief weekly motivational interviewing instant messages from clinical social workers | 18 |

|                      |                                   |                                             |                                                                                                                                                |                                                       |                          |                                                                                                                                                                                                                                                                                                                                                                                      |    |
|----------------------|-----------------------------------|---------------------------------------------|------------------------------------------------------------------------------------------------------------------------------------------------|-------------------------------------------------------|--------------------------|--------------------------------------------------------------------------------------------------------------------------------------------------------------------------------------------------------------------------------------------------------------------------------------------------------------------------------------------------------------------------------------|----|
| Zatzick et al (2015) | Afterdeployment.org and LifeArmor | CBT principles; Self-guided psychoeducation | Online self-assessments, self management strategies, videos, and psychoeducation materials; median time of 2.25 hours per patient <sup>c</sup> | Adults exposed to intentional or unintentional injury | Acutely following injury | Stepped care approach. Participants were encouraged to use Afterdeployment.org and LifeArmor application (smartphone application with the same material as Afterdeployment.org). Patients also had access to a care manager with whom they discussed PTSD treatment preferences. Afterdeployment.org and LifeArmor include community forum but do not include therapist interaction. | 22 |
|----------------------|-----------------------------------|---------------------------------------------|------------------------------------------------------------------------------------------------------------------------------------------------|-------------------------------------------------------|--------------------------|--------------------------------------------------------------------------------------------------------------------------------------------------------------------------------------------------------------------------------------------------------------------------------------------------------------------------------------------------------------------------------------|----|

<sup>a</sup>NR = Not reported.

<sup>b</sup>CBT = Cognitive behavioural therapy.

<sup>c</sup>This intervention included contact with care managers. Median time included time spent in both online interactive components and with care manager.
