# Supplementary material for: Internet-Delivered Early Interventions for Individuals Exposed to Traumatic Events: Systematic Review
Source: PubMed Central journal article supplement (PMC6300083; doi:10.2196/jmir.9795), 2018-11-14
Supplement: jmir_v20i11e280_app2.pdf [file jmir_v20i11e280_app2.pdf]

## Multimedia Appendix 2. Information on internet-delivered early interventions.

| Study                        | N (# male);<br>Mean age<br>(SD)               | Time since<br>trauma                  | Setting                                                                                                                                      | Intervention<br>condition(s)                                                                           | Design;<br>F/U <sup>a</sup><br>periods                | Selected or indicated                                                                                          |
|------------------------------|-----------------------------------------------|---------------------------------------|----------------------------------------------------------------------------------------------------------------------------------------------|--------------------------------------------------------------------------------------------------------|-------------------------------------------------------|----------------------------------------------------------------------------------------------------------------|
| Cox et al (2010)             | 85 (59);<br>10.90 (2.18)                      | Within 72<br>hours of injury          | Pediatric surgical<br>wards                                                                                                                  | 1: Kids and<br>accidents; 2:<br>assessment-only                                                        | RCT <sup>b</sup> ; 4-<br>6 weeks,<br>6 M <sup>c</sup> | Selected                                                                                                       |
| Kassam-Adams et<br>al (2016) | 72 (39); 9.7<br>(NR)                          | Within 2<br>weeks of<br>medical event | Hospital intensive<br>care unit, general<br>pediatric, or<br>surgical unit                                                                   | 1: Coping coach; 2:<br>Wait-list condition                                                             | RCT; 6,<br>12, 18<br>weeks                            | Selected <sup>d</sup>                                                                                          |
| Mouthaan et al<br>(2013)     | 300 (180);<br>43.8 (15.9)                     | 72 hours post<br>injury               | Academic Medical<br>Center and VU<br>University Medical<br>Center                                                                            | 1: Trauma TIPS; 2.<br>TAU <sup>e</sup>                                                                 | RCT; 3,<br>6, 12 M                                    | Selected                                                                                                       |
| Ruggiero et al<br>(2015)     | 2000 (981);<br>14.5 (1.7)                     | Within 12 M<br>after tornado          | Adolescents in<br>local communities<br>affected by<br>tornadoes                                                                              | 1. Bounce Back<br>Now; 2. Bounce<br>Back Now + 7-<br>module adult self-<br>help; 3.<br>Assessment-only | Populatio<br>n-based<br>RCT; 4,<br>12 M               | Selected but within<br>modules indicated                                                                       |
| Steinmatz et al<br>(2012)    | 56 (8 male);<br>43.06<br>(11.51) <sup>f</sup> | 11 M post<br>hurricane Ike            | University of Texas<br>Medical Branch                                                                                                        | 1. My Disaster<br>Recovery; 2.<br>Information only<br>website; 3. TAU                                  | Pilot<br>RCT; 1<br>M                                  | Indicated (scores of 5<br>on the TSQ <sup>g</sup> or 20 on<br>the PSS <sup>h</sup> included)                   |
| Van Voorhees et<br>al (2012) | 49 (44<br>male); 29.57<br>(7.17)              | 5 years post<br>deployment            | Social media,<br>Prevail Health<br>Solutions Website,<br>Craigslist                                                                          | 1. VETS PREVAIL                                                                                        | Open<br>trial; 4,<br>8, and 12<br>weeks               | Indicated (subthreshold<br>PTSD <sup>i</sup> and depression<br>symptoms; 8-35 score<br>on CES-D <sup>j</sup> ) |
| Zatzick et al<br>(2015)      | 121 (78<br>male); 43.17<br>(14.69)            | Immediately<br>post injury            | University of<br>Washington's<br>Harborview;<br>Medical Center<br>(trauma center,<br>inpatient surgical<br>ward, or emergency<br>department) | 1.<br>Afterdeployment.or<br>g + LifeArmor<br>Smartphone App 2.<br>TAU                                  | RCT; 1,<br>3, and 6<br>M                              | Indicated (scores of<br>≥35 on PCL-C <sup>k</sup><br>included)                                                 |

<sup>a</sup>F/U: follow-up assessments.

<sup>b</sup>RCT: randomized controlled trial.

<sup>c</sup>M: months.

<sup>d</sup>Exploratory analyses were conducted comparing children with elevated posttraumatic stress disorder severity scores at baseline in both groups. Effect sizes were medium to large for baseline to 6 weeks ( $d=-0.84$ ) and for baseline to 12 weeks ( $d=-0.68$ ). Effect sizes were small for children not at risk from baseline to 6 weeks ( $d=-0.15$ ) and for baseline to 12 weeks ( $d=-0.24$ ).

<sup>e</sup>TAU: Treatment-As-Usual.

<sup>f</sup>Mean age (SD) for intervention group reported because mean age of entire sample not provided.

<sup>g</sup>NR: Not reported.

<sup>h</sup>TSQ: Trauma Screening Questionnaire.

<sup>i</sup>PSS: Perceived Stress Scale.

<sup>j</sup>PTSD: Posttraumatic stress disorder.

<sup>k</sup>CES-D: Center for Epidemiologic Studies Depression Scale.

<sup>l</sup>PCL-C: PTSD checklist civilian version.
