# Supplementary material for: Internet-Delivered Early Interventions for Individuals Exposed to Traumatic Events: Systematic Review
Source: PubMed Central journal article supplement (PMC6300083; doi:10.2196/jmir.9795), 2018-11-14
Supplement: jmir_v20i11e280_app3.pdf [file jmir_v20i11e280_app3.pdf]

### Multimedia Appendix 3. Mean scores on outcome measures at pre- and postintervention.

| Study                     | Outcome measures                                                       | Cut-off scores                                                                                          | Mean scores for intervention group                                                                                                                                                                                                                                                                                                                                                                   | Mean scores for control group                                                                                                                                                                       |
|---------------------------|------------------------------------------------------------------------|---------------------------------------------------------------------------------------------------------|------------------------------------------------------------------------------------------------------------------------------------------------------------------------------------------------------------------------------------------------------------------------------------------------------------------------------------------------------------------------------------------------------|-----------------------------------------------------------------------------------------------------------------------------------------------------------------------------------------------------|
| Cox et al (2010)          | TSCC-A <sup>b</sup> ;<br>IES-R <sup>c</sup>                            | NR <sup>d</sup> ; 24=subclinical<br>PTSD <sup>e</sup> ; 33=probable<br>PTSD dx <sup>f</sup>             | TSCC-A Pre: 24.31 (13.73); TSCC-A Post: 18.90 (12.71); IES-R Pre: 10.72 (10.52); IES-R Post: 6.00 (7.50)                                                                                                                                                                                                                                                                                             | TSCC-A Pre: 18.07 (12.99); TSCC-A Post: 17.30 (16.85); IES-R Pre: 9.45 (9.53); IES-R Post: 5.11 (6.81)                                                                                              |
| Kassam-Adams et al (2016) | CPSS <sup>g</sup> ;<br>PedsQL <sup>h</sup>                             | ≥12=probable PTSD dx;<br>78=special healthcare needs; 76=major chronic condition; 70=moderate condition | CPSS Pre: 18.4 (11.8); CPSS Post: 13.0 (12.1);<br>PedsQL Pre: 78.0 (17.3); PedsQL Post: 75.1 (19.1)                                                                                                                                                                                                                                                                                                  | CPSS Pre: 13.1 (7.3); CPSS Post: 12.5 (10.0);<br>PedsQL Pre: 82.1 (15.8); PedsQL Post: 81.4 (15.1)                                                                                                  |
| Mouthaan et al (2013)     | CAPS <sup>i</sup> ; IES-R;<br>HADS <sup>j</sup>                        | ≥45=PTSD dx;<br>24=subclinical PTSD;<br>33=probable PTSD dx; 8-10=mild; 11-14=moderate; 15-21=severe    | CAPS Post: 17.7 (NR) <sup>k</sup> ; IES-R Pre: 17.60 (16.82); IES-R Post: 10.6 (NR); HADS-anxiety Pre: 4.36 (3.90); HADS-anxiety Post: 4.6 (NR); HADS-depression Pre: 3.69 (3.50); HADS-depression Post: 3.6 (NR)                                                                                                                                                                                    | CAPS Post: 20.2 (NR); IES-R Pre: 21.22 (19.09); IES-R Post: 12.4 (NR); HADS-anxiety Pre: 4.87 (4.33); HADS-anxiety Post: 4.8 (NR); HADS-depression Pre: 4.13 (4.26); HADS-depression Post: 4.1 (NR) |
| Ruggiero et al (2015)     | National Survey of Adolescents PTSD, depression, substance use modules | NR                                                                                                      | BBN PTSD Pre: 2.73 (3.65); BBN PTSD Post: 1.34 (2.74); BBN+ASH PTSD Pre: 2.26 (3.25); BBN+ASH PTSD Post: 1.01 (2.15); BBN Depression Pre: 1.40 (2.00); BBN Depression Post: 0.79 (1.61); BBN+ASH Depression Pre: 1.22 (1.81); BBN+ASH Depression Post: 0.64 (1.30); BBN Alcohol Pre: 0.43 (3.03); BBN Alcohol Post: 0.78 (5.91); BBN+ASH Alcohol Pre: 0.67 (4.38); BBN+ASH Alcohol Post: 0.50 (4.56) | PTSD Pre: 2.54 (3.35); PTSD Post: 1.30 (2.63); Depression Pre: 1.43 (1.96); Depression Post: 0.69 (1.40); Alcohol Pre: 1.12 (9.25); Alcohol Post: 0.92 (9.61)                                       |

|                           |                                                                                                  |                                                                                                                                                                             |                                                                                                                                                                                                                                                                                                                                                                                                                                                                                                                                                                                                        |                                                                                                                                                                                                                                                            |
|---------------------------|--------------------------------------------------------------------------------------------------|-----------------------------------------------------------------------------------------------------------------------------------------------------------------------------|--------------------------------------------------------------------------------------------------------------------------------------------------------------------------------------------------------------------------------------------------------------------------------------------------------------------------------------------------------------------------------------------------------------------------------------------------------------------------------------------------------------------------------------------------------------------------------------------------------|------------------------------------------------------------------------------------------------------------------------------------------------------------------------------------------------------------------------------------------------------------|
| Steinmatz et al (2012)    | PSS <sup>l</sup> ; CSE <sup>m</sup> ; MPSS <sup>n</sup> ; CES-D <sup>o</sup> ; PSWQ <sup>p</sup> | 0-13=low stress; 14-26=moderate stress; 27-40=high stress; N/A; $\geq 29$ =PTSD dx; $\geq 20$ =clinical depression; 16-39=low worry; 40-59=moderate worry; 60-80=high worry | MDR PSS Pre: 21.06 (5.36); MDR PSS Post: 19.11 (7.14); IOW PSS Pre: 23.42 (6.09); IOW PSS Post: 23.58 (6.16); MDR CSE Pre: 104.11 (27.45); MDR CSE Post: 109.44 (25.83); IOW CSE Pre: 93.00 (26.80); IOW CSE Post: 101.26 (28.35); MDR MPSS Pre: 26.72 (17.39); MDR MPSS Post: 23.94 (16.74); IOW MPSS Pre: 29.84 (18.42); IOW MPSS Post: 29.26 (19.46); MDR CES-D Pre: 24.22 (10.21); MDR CES-D Post: 17.72 (11.74); IOW CES-D Pre: 24.58 (12.56); IOW CES-D Post: 22.58 (12.76); MDR PSWQ Pre: 52.83 (14.81); MDR PSWQ Post: 47.94 (5.47); IOW PSWQ Pre: 59.68 (15.47); IOW PSWQ Post: 58.00 (15.21) | PSS Pre: 22.00 (4.96); PSS Post: 21.79 (5.37); CSE Pre: 87.63 (21.74); CSE Post: 100.58 (22.52); MPSS Pre: 28.26 (18.42); MPSS Post: 21.58 (16.30); CES-D Pre: 22.37 (12.10); CES-D Post: 21.05 (11.03); PSWQ Pre: 51.37 (15.25); PSWQ Post: 52.68 (15.14) |
| Van Voorhees et al (2012) | CES-D 10; PCL-M <sup>q</sup>                                                                     | $\geq 9$ =clinically sig <sup>r</sup> symptoms of depression; $\geq 30$ =clinically sig symptoms of posttraumatic stress                                                    | CES-D Pre: 8.9 (4.0); CES-D > 9 Pre: 40 (20.0); CES-D Post: 7.3 (4.2); CES-D > 9 Post: 38.0 (19.0); PCL-M Pre: 35.0 (10.8); PCL-M > 30 Pre: 64.0 (32.0); PCL-M Post: 32.0 (11.4); PCL-M > 30 Post: 56.0 (28.0);                                                                                                                                                                                                                                                                                                                                                                                        |                                                                                                                                                                                                                                                            |
| Zatzick et al (2015)      | PCL-C <sup>s</sup> ; PHQ-9 <sup>t</sup>                                                          | $\geq 35$ =PTSD dx; 5-9=mild depression; 10-14=moderate depression; 15-19=moderately severe depression; 20-27=severe depression                                             | PCL-C Pre: 46.91 (10.16); PCL-C Post: 44.37 (NR); PHQ-9 Pre: 14.23 (5.68); PHQ-9 Post: 13.39 (NR)                                                                                                                                                                                                                                                                                                                                                                                                                                                                                                      | PCL-C Pre: 47.66 (10.85) PCL-C Post: 44.64 (NR); PHQ-9 Pre: 15.17 (5.04); PHQ-9 Post: 14.00 (NR)                                                                                                                                                           |

<sup>a</sup>Findings are reported on intent-to-treat analyses when available and on earliest postintervention assessment time points

<sup>b</sup>TSCC-A: Trauma-Symptom Checklist for Children-A.

<sup>c</sup>IES-R: Impact of Event Scale-Revised.

<sup>d</sup>NR: Not reported.

<sup>e</sup>PTSD: Posttraumatic stress disorder.

<sup>f</sup>dx: Diagnosis.

<sup>g</sup>CPSS: The Child PTSD Symptom Scale

<sup>h</sup>PedsQL: Pediatric Quality of Life Inventory.

<sup>i</sup>CAPS: Clinician-Administered PTSD Scale.

<sup>j</sup>HADS: Hospital Anxiety and Depression Rating Scale.

<sup>k</sup>CAPS pre-intervention scores not reported.

<sup>l</sup>PSS: Perceived Stress Scale.

<sup>m</sup>CSE: The Coping Self-Efficacy Scale for Trauma.

<sup>n</sup>MPSS: Modified PTSD Symptoms Scale

<sup>o</sup>CES-D: The Center for Epidemiologic Studies Depression Scale.

<sup>p</sup>PSWQ: Penn State Worry Questionnaire.

<sup>q</sup>PCL-M: PTSD-Checklist Military version.

<sup>r</sup>sig: Significant.

<sup>s</sup>PCL-C: PTSD Checklist Civilian version.

<sup>t</sup>PHQ-9: Patient Health Questionnaire-9
